# Supplementary material for: Cross-generational effects of male reproductive success and offspring immunocompetence in Drosophila melanogaster
Source: Atypon-hosted journal article supplement (doi:10.1139/facets-2015-0007), 2017-01-01
Supplement: facets-2015-0007_supplement4.pdf [file facets-2015-0007_supplement4.pdf]

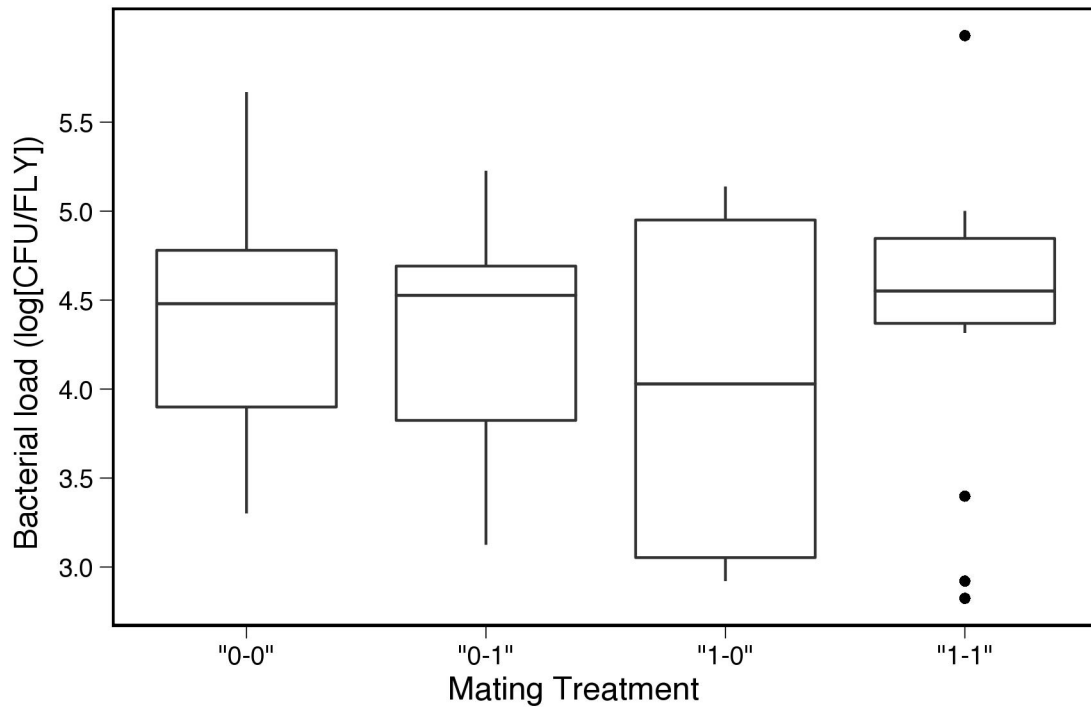

**Supplementary Material 4.** Boxplots showing distribution of bacterial loads (log[colony forming units per fly]) measured in virgin adult female *D. melanogaster* from four different mating treatments. In the control group (“0-0” treatment), females were kept in isolation for the entire experimental 2-day period. In two treatments, females were mated once, either on the 1<sup>st</sup> or the 2<sup>nd</sup> day of the experimental period (treatments “1-0” and “0-1”, respectively). In the final treatment, females were mated on each of the two days of the experimental period. The bacterial loads of these groups did not differ from each other ( $F_{3,45} = 0.07$ ,  $p = 0.98$ ). The box encloses values between the first and third quartiles of the data (the inter-quartile range, IQR), while the horizontal bar within the box indicates the median. Whiskers extend from the box to largest/smallest values that are within 1.5 x the IQR of the box. Values outside that range are outliers and are indicated by circles.
